# The American Journal of Psychiatry

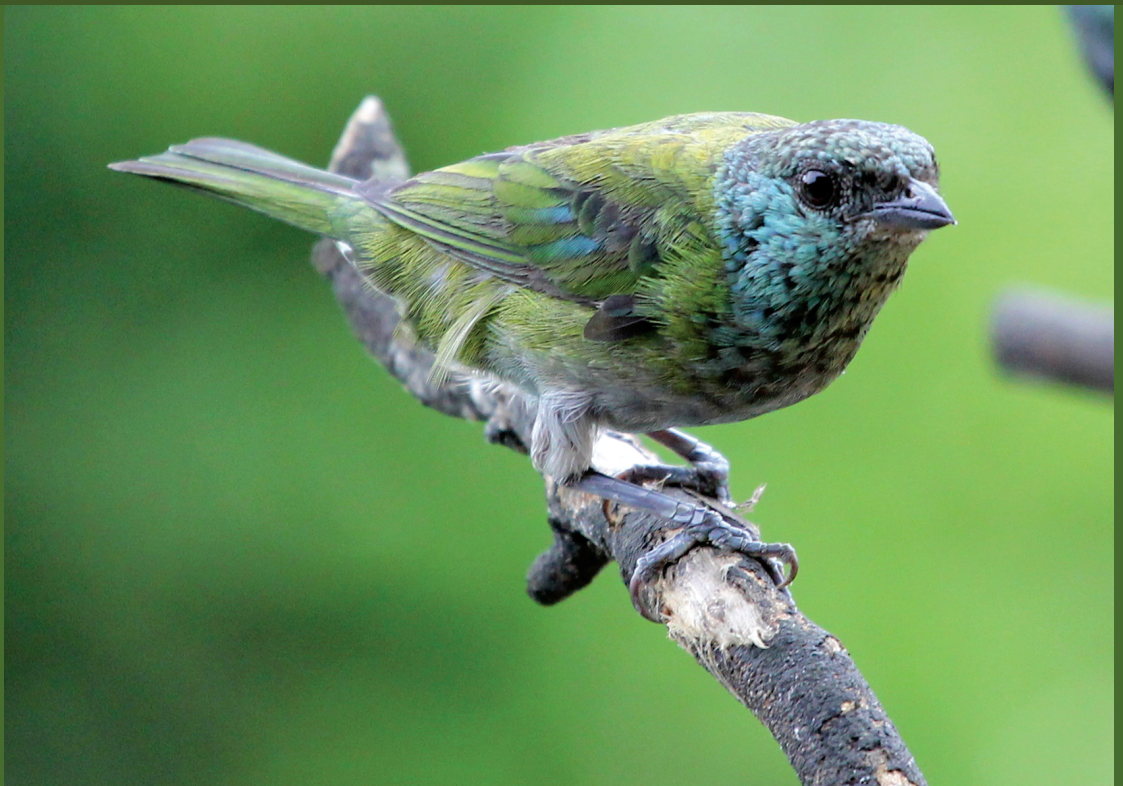

Cannabidiol (CBD) as an Adjunctive Therapy in Schizophrenia:  
A Multicenter Randomized Controlled Trial

Impact of SSRI Therapy on Risk of Conversion From Mild Cognitive Impairment  
to Alzheimer's Dementia in Individuals With Previous Depression

Improving the Efficiency of Psychotherapy for Depression:  
Computer-Assisted Versus Standard CBT

Antidepressant Outcomes Predicted by Genetic Variation in  
Corticotropin-Releasing Hormone Binding Protein
